# Supplementary material for: Cannabidiol and Its Combinations with Nonsteroidal Anti-Inflammatory Drugs Induce Apoptosis and Inhibit Activation of NF-κB Signaling in Vulvar Squamous Cell Carcinoma
Source: MDPI journal article supplement (doi:10.3390/molecules27248779), 2022-12-11
Supplement: s1 [file s1]

# Supplementary Figures

*Article*

**CANNABIDIOL AND ITS COMBINATIONS WITH NONSTEROIDAL ANTI-INFLAMMATORY DRUGS INDUCE APOPTOSIS AND INHIBIT ACTIVATION OF NF-KB SIGNALING IN VULVAR SQUAMOUS CELL CARCINOMA**

**Violetta Krajka-Kuźniak<sup>1\*</sup>, Katarzyna Papierska<sup>1</sup>, Maria Narożna<sup>2</sup>, Anna Jelińska<sup>3</sup> and Aleksandra Majchrzak-Celińska<sup>1</sup>**

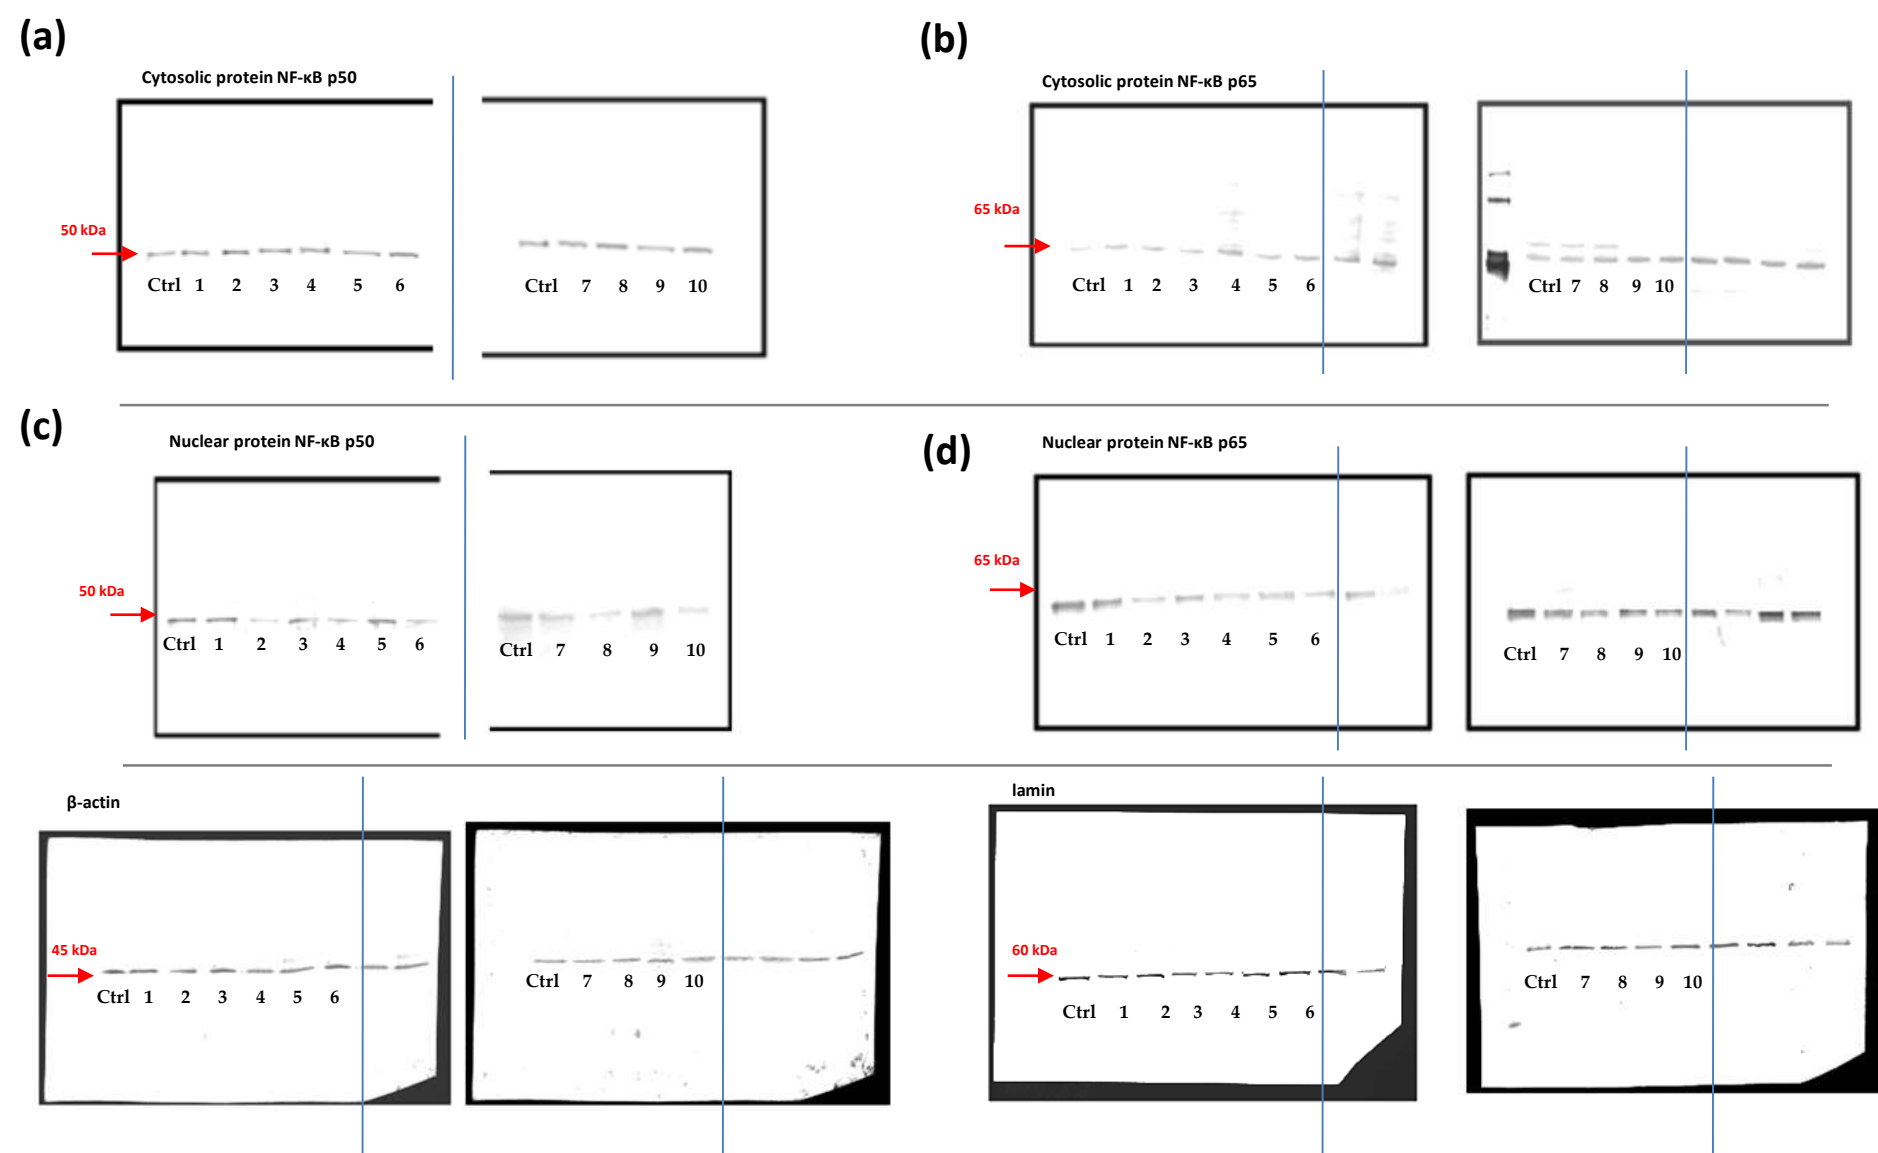

**Figure S1.** The representative immunoblots respectively for Figure 4. **Panel a and b** - The level of NF- $\kappa$ B p50 and p65 protein in the cytosolic fraction. **Panel c and d** - The level of NF- $\kappa$ B p50 and p65 protein in the nuclear fraction. Data were normalized against the level of  $\beta$ -actin (cytosolic proteins) or lamin (nuclear proteins). **Ctrl** - Control, **1** - CBD 10  $\mu$ M, **2** - CBD 20  $\mu$ M, **3** - DIC 10, **4** DIC - 50  $\mu$ M, **5** - CBD + DIC 10  $\mu$ M, **6** - CBD + DIC 20  $\mu$ M, **7** - IBU 10  $\mu$ M, **8** - IBU 50  $\mu$ M, **9** - CBD + IBU 10  $\mu$ M, **10** - CBD + IBU 20  $\mu$ M.

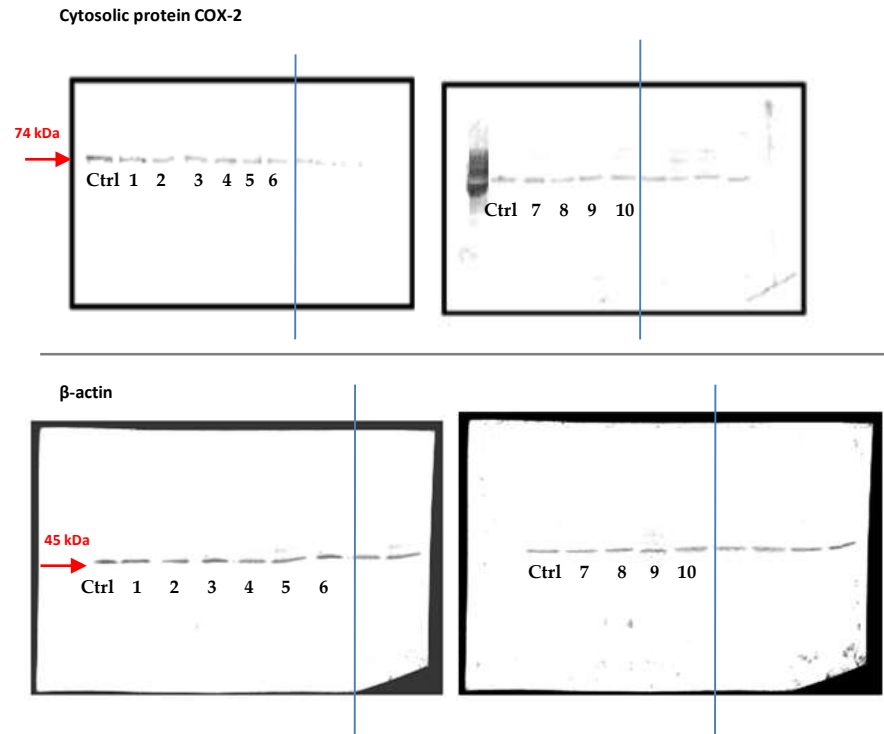

**Figure S2.** The representative immunoblots respectively for Figure 6. *The level of COX-2 protein.* Data were normalized against the level of  $\beta$ -actin. **Ctrl** – Control, **1** - CBD 10  $\mu$ M, **2** - CBD 20  $\mu$ M, **3**- DIC 10, **4** DIC – 50  $\mu$ M, **5** – CBD + DIC 10  $\mu$ M, **6** – CBD + DIC 20  $\mu$ M, **7** – IBU 10  $\mu$ M, **8** – IBU 50  $\mu$ M, **9** – CBD + IBU 10  $\mu$ M, **10** – CBD + IBU 20  $\mu$ M.

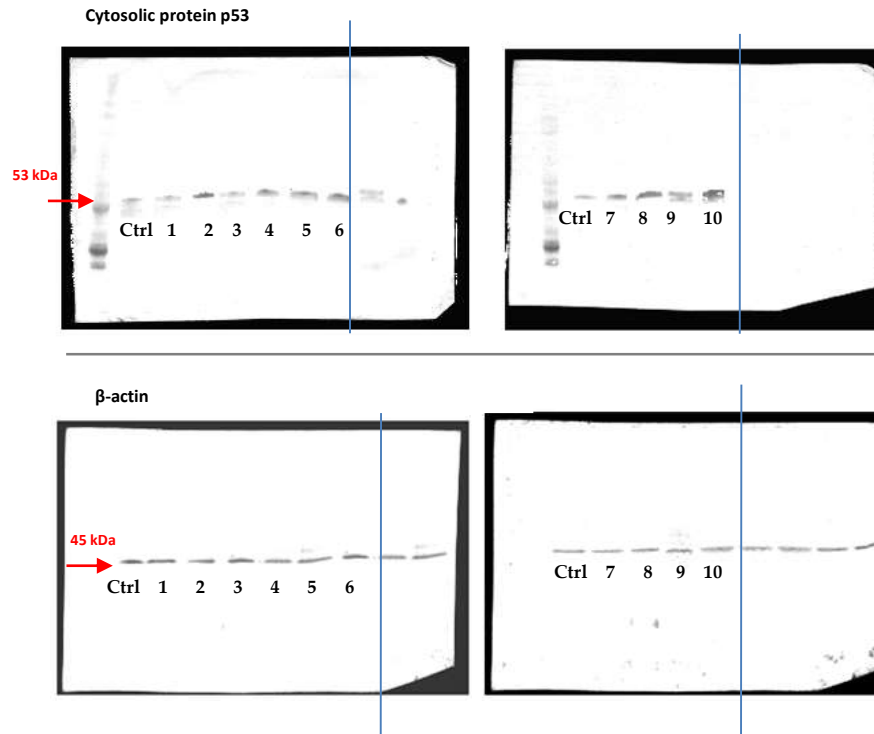

**Figure S3.** The representative immunoblots respectively for Figure 7. *The level of p53 protein.* Data were normalized against the level of  $\beta$ -actin. **Ctrl** – Control, **1** - CBD 10  $\mu$ M, **2** - CBD 20  $\mu$ M, **3**- DIC 10, **4** DIC – 50  $\mu$ M, **5** – CBD + DIC 10  $\mu$ M, **6** – CBC + DIC 20  $\mu$ M, **7** – IBU 10  $\mu$ M, **8** – IBU 50  $\mu$ M, **9** – CBD + IBU 10  $\mu$ M, **10** – CBD + IBU 20  $\mu$ M.
